# Supplementary material
Source: Springer Nature journal article supplement (https://www.springermedizin.de/resource/supplementary/12933_2006_64_MOESM1_ESM.pdf/9539518)

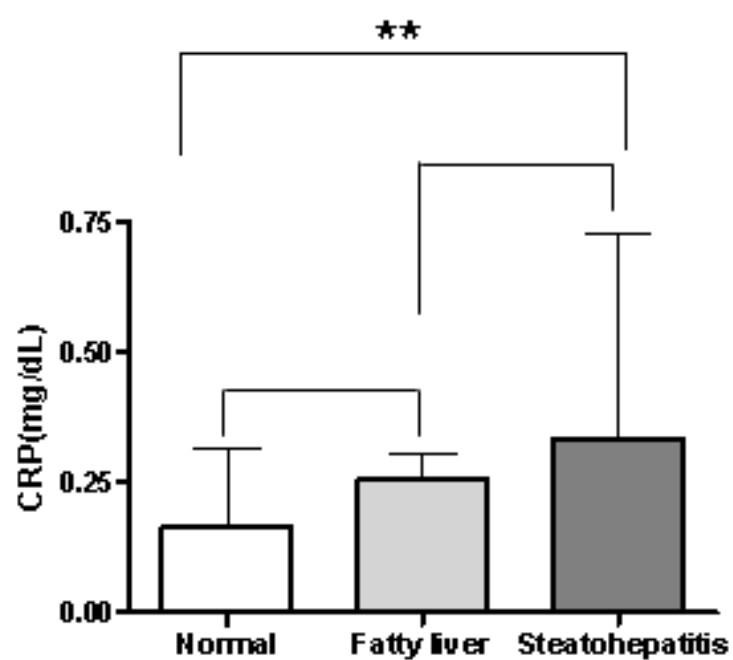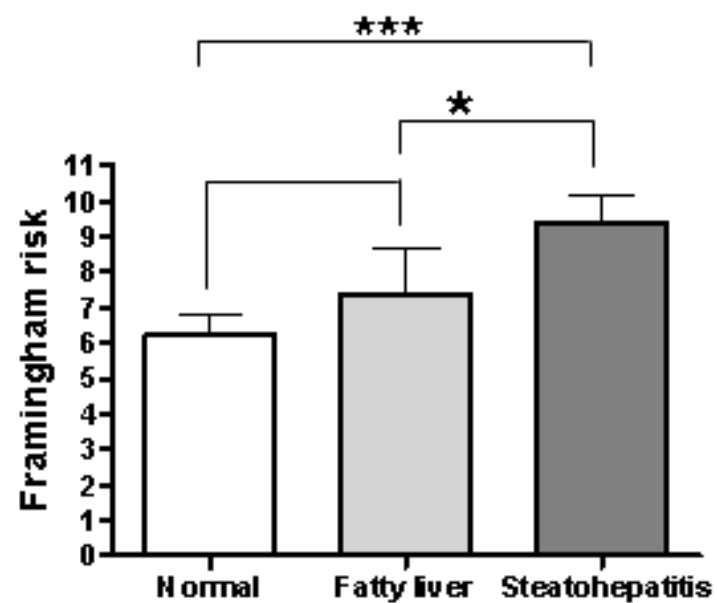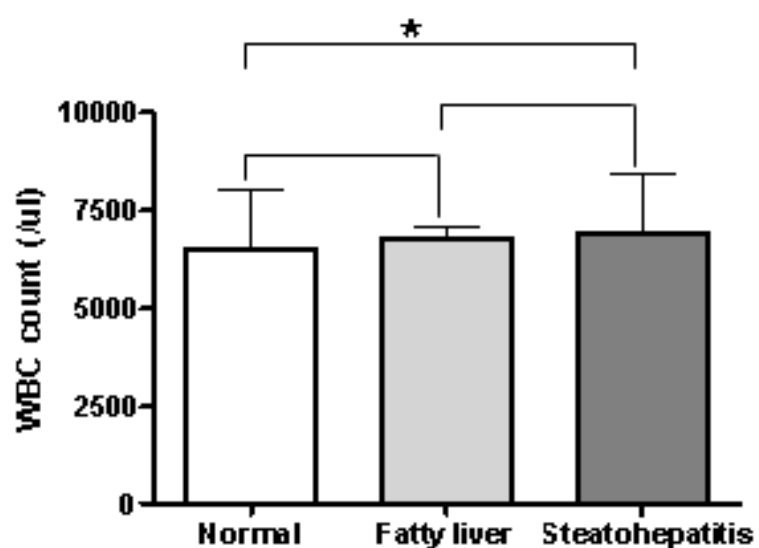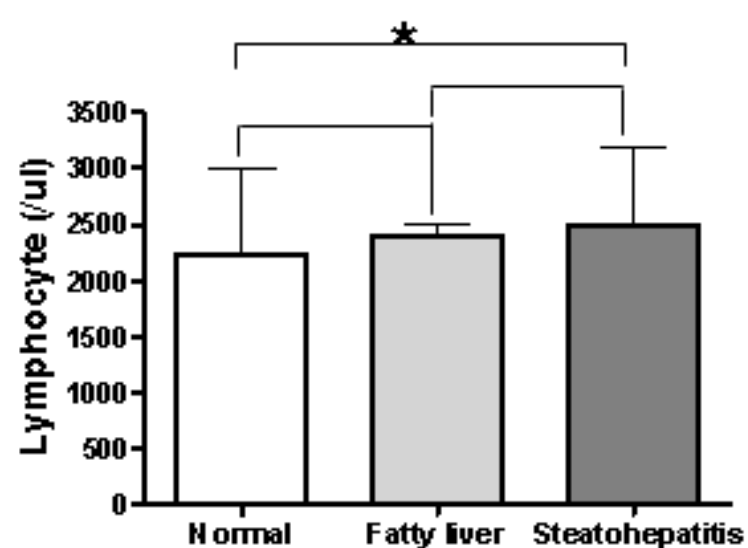

Supplement: MOESM1 [file 9539518]
